# Supplementary material for: Designing Novel Multi-Epitope Vaccine Construct against Prevotella intermedia-Interpain A: An Immunoinformatics Approach
Source: MDPI journal article supplement (doi:10.3390/medicina59020302), 2023-02-06
Supplement: s1 [file s1]

| n  | Start Position | Sequence                | End Position |
|----|----------------|-------------------------|--------------|
| 1  | 4              | PDPSKYAAEVSTLL          | 17           |
| 2  | 26             | PYNKLLP                 | 32           |
| 3  | 39             | LITGCVATATAQVLNYFKYPVRG | 61           |
| 4  | 63             | GSHTVHYPA               | 71           |
| 5  | 105            | EANAVATLMLHCGVAS        | 120          |
| 6  | 134            | YMTDCAAGLRT             | 144          |
| 7  | 174            | KGHPLIYGGVSP            | 185          |
| 8  | 192            | AGHAFVID                | 199          |
| 9  | 203            | KAGLVSV                 | 209          |
| 10 | 217            | VDGYKIDL                | 225          |
| 11 | 240            | MVRGVYG                 | 246          |

Contact **Pedro Reche**  
Last Update: 19 August 2022

**Figure S1:** Antigenic Peptides determinants.

## AllergenFP v.1.0

Bioinformatics tool for allergenicity prediction

MISKIL...AVVADQVD...  
VMVD...JHRC...  
QNTK...EDGL...  
MKCPLVKGQYD...  
VTVKLIGDNGV...  
1000100011011...  
0010010001010...  
00100110100100...  
100100010001100...



**Your sequence is:**

**PROBABLE NON-ALLERGEN**

The protein with the highest Tanimoto similarity index 0.8 is:

[UniProtKB accession number O75976](#)

**Figure S2.** Prediction of Allergenicity.

## VaxiJen RESULTS

**Model selected: bacteria**

**Threshold for this model: 0.4**

**Your Sequence:**

```
VIKPDPSKYAAEVSTLLTTTWGQQMPYNKLL  
PKTKKGRLITGCVATATAQVLNYFKYPVRGI  
GSHTVHYPANDPSGTAISADFGNTTYDWANM  
KDNYSGNYTEAEANAVATLMLHCGVASEMQY  
GGPNEGSGAYMTDCAAGLRITYFGFTDAEYIT  
RANYTDEQWMDIVFSELTKGHPLIYGGVSPG  
SMGQDAGHAFVIDGYNKAGLVSVNWGWNGDV  
DGYYKIDLLNPGNMYSFTAQDMVRGVYGKP  
LED
```

Overall Prediction for the Protective Antigen = **0.4690** ( Probable **ANTIGEN** ).

**Figure S3.** Antigenicity Prediction.

| Cluster | Members | Representative | Weighted Score |
|---------|---------|----------------|----------------|
| 0       | 99      | Center         | -596.9         |
|         |         | Lowest Energy  | -661.2         |
| 1       | 74      | Center         | -566.8         |
|         |         | Lowest Energy  | -645.4         |
| 2       | 57      | Center         | -580.6         |
|         |         | Lowest Energy  | -617.8         |
| 3       | 56      | Center         | -623.1         |
|         |         | Lowest Energy  | -651.1         |
| 4       | 52      | Center         | -542.0         |
|         |         | Lowest Energy  | -639.3         |
| 5       | 46      | Center         | -632.9         |
|         |         | Lowest Energy  | -632.9         |
| 6       | 46      | Center         | -592.0         |
|         |         | Lowest Energy  | -611.0         |
| 7       | 35      | Center         | -612.6         |
|         |         | Lowest Energy  | -612.6         |
| 8       | 32      | Center         | -542.5         |
|         |         | Lowest Energy  | -634.2         |
| 9       | 31      | Center         | -622.1         |
|         |         | Lowest Energy  | -622.1         |
| 10      | 31      | Center         | -594.8         |
|         |         | Lowest Energy  | -594.8         |

**Figure S4:** Binding energy of the Predicted vaccine structure with C3.

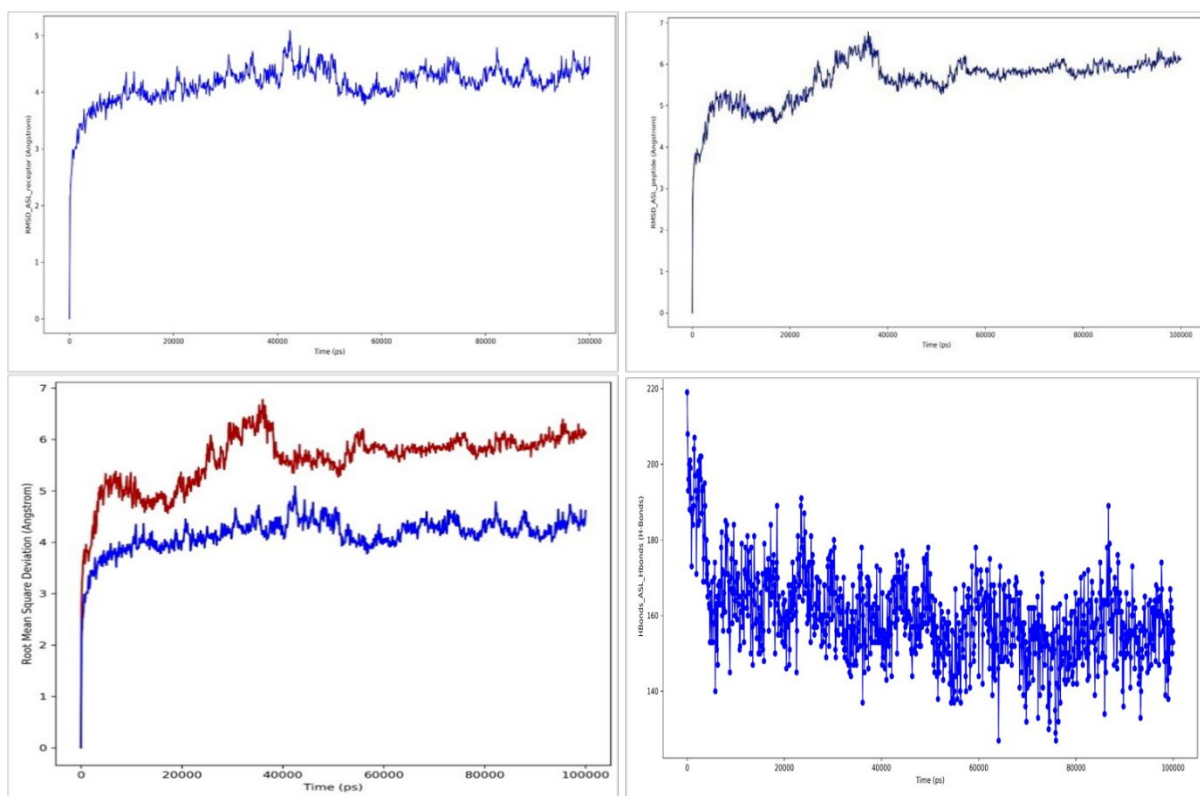

**Figure S5:** Molecular dynamic simulation analysis.

**Table S1:** CTL epitopes for N protein (NetCTL1.2).

| <b>S. No</b> | <b>Peptide</b> |
|--------------|----------------|
| <b>1.</b>    | YAAEVSTLL      |
| <b>2.</b>    | TTWGQQMPY      |
| <b>3.</b>    | TATAQVLNY      |
| <b>4.</b>    | ATAQVLNYF      |
| <b>5.</b>    | GIGSHTVHY      |
| <b>6.</b>    | SADFGNTTY      |
| <b>7.</b>    | MKDNYSGNY      |
| <b>8.</b>    | YTEAEANAV      |
| <b>9.</b>    | MTDCAAGLR      |
| <b>10.</b>   | FTDAEYITR      |
| <b>11.</b>   | YTDEQWMDI      |
| <b>12.</b>   | WMDIVFSEL      |
| <b>13.</b>   | LTKGHPLIY      |
| <b>14.</b>   | WNGDVDGYY      |
| <b>15.</b>   | EQDMVRGVY      |
